## Research Article

# The association of *miR34b/c* and *TP53* gene polymorphisms with Wilms tumor risk in Chinese children

Juxiang Wang<sup>1,\*</sup>, Susu Lou<sup>1,\*</sup>, Xiaokai Huang<sup>1,\*</sup>, Yixiao Mo<sup>1</sup>, Zhen Wang<sup>1</sup>, Jinhong Zhu<sup>2</sup>, Xiaoqian Tian<sup>1</sup>, Jiandong Shi<sup>1</sup>, Haixia Zhou<sup>1</sup>,  Jing He<sup>1,3</sup> and Jichen Ruan<sup>1</sup>

<sup>1</sup>Department of Hematology, The Second Affiliated Hospital and Yuying Children's Hospital of Wenzhou Medical University, Wenzhou 325027, Zhejiang, China; <sup>2</sup>Department of Clinical Laboratory, Biobank, Harbin Medical University Cancer Hospital, Harbin 150040, Heilongjiang, China; <sup>3</sup>Department of Pediatric Surgery, Guangzhou Institute of Pediatrics, Guangdong Provincial Key Laboratory of Research in Structural Birth Defect Disease, Guangzhou Women and Children's Medical Center, Guangzhou Medical University, Guangzhou 510623, Guangdong, China

**Correspondence:** Jichen Ruan ([ruanjichen@163.com](mailto:ruanjichen@163.com)) or Jing He ([hejing198374@gmail.com](mailto:hejing198374@gmail.com))

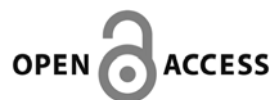

Wilms tumor is the most common pediatric malignancy in the kidney. The *miR34b/c* is a downstream target gene of the transcription factor p53. The important role of *TP53* mutations, the methylation of *miR34b/c*, and the interaction between these two molecules in tumorigenesis have been well documented. Due to the biological connection between p53 and *miR34b/c*, in the present study, we investigated the association between polymorphisms in these two molecules and Wilms tumor susceptibility through genotyping two important functional polymorphisms (*miR34b/c* rs4938723 T>C and *TP53* rs1042522 C>G) in 183 cases and 603 controls. Adjusted odds ratios (ORs) and 95% confidence intervals (CIs) derived from the logistic regression analysis were used to assess the correlation of *miR34b/c* rs4938723 and *TP53* rs1042522 polymorphisms with Wilms tumor risk. Our results indicated that the association of *miR34b/c* rs4938723 and *TP53* rs1042522 polymorphisms with Wilms tumor susceptibility was not statistically significant. Stratified analysis by age, gender, and clinical stage, as well as combined effect analysis were also performed, yet, no significant association was found. In conclusion, our study indicated a lack of association between the two selected polymorphisms and Wilms tumor susceptibility. Our findings need to be verified in studies with larger sample size in the future.

## Introduction

Wilms tumor, a malignant kidney tumor in children, currently has achieved a high survival rate in different geographical regions [1,2]. It is reported that approximately 98% of Wilms tumor are sporadic [3]; and approximately 80 percent of Wilms tumor patients are diagnosed before 5 years old [4]. Molecular genetics studies showed that Wilms tumor had a complex etiology involving genetic lesions in the multiple sites [5,6]; and various gene polymorphisms play pivotal roles in the occurrence of Wilms tumor. However, there remain numerous functional single nucleotide polymorphisms (SNPs) in oncogenes and tumor suppressor genes, whose roles in Wilms tumor susceptibility need to be clarified.

As we know, gene mutation is a crucial factor in the tumorigenesis of Wilms tumor. For example, mutations in the coding sequence of the *p53* gene were found in Wilms tumor patients by several research groups [7,8]. Apart from that, Slade et al. [9] showed that translocation t(5;6)(q21;q21), leading to the inactivation of the *HACE1* gene, predisposed Wilms tumor. Moreover, over the past decade, many genes have been found to be involved in the development of Wilms tumor, including *MYCN* [10], *CTNNB1* [11], *WTX* [12], *CHEK2* [6], *BARD1* [13], *hOGG1* and *FEN1* gene [14] and *KRAS* [15].

\*These authors contributed equally to this work.

Received: 04 December 2019  
 Revised: 18 February 2020  
 Accepted: 20 February 2020

Accepted Manuscript online:  
 21 February 2020  
 Version of Record published:  
 28 February 2020

MicroRNAs are recognized as endogenous non-coding RNAs that can play different biological roles by targeting related genes [16]. In addition, microRNAs are considered promising biomarkers for their stability and ease of detection [17]. *miR34b/c*, a recognized tumor-suppressor gene, was found to be methylated in a variety of tumors [18]. Among the *mir-34* family, *miR34b/c* has a stronger ability to inhibit tumor growth, which not only enhanced the attachment of tumor cells, but also inhibited the growth and invasion of cells [19]. On one hand, *miR34b/c* is a mediator of the P53 signaling network and on the other hand, *TP53* can regulate the transcription of *miR34b/c* [20]. The rs4938723 T>C polymorphism, situated in the *miR34b/c* promoter region, influenced the expression of *miR34b/c* by affecting the binding efficiency of GATA-X transcription factor [21].

*TP53* is a tumor suppressor, which inhibits tumorigenesis mainly by regulating gene transcription [22]. Mutations in *TP53* are common in the most cancer types and have been the focus of various research groups. The *TP53* can facilitate DNA repair by stalling the cell cycle in the G<sub>1</sub> phase when DNA damage occurs [23]. Moreover, Franken et al. [24] reported that the expression of p53 protein was positively correlated with tumor invasion. *TP53* rs1042522 C>G polymorphism, the polymorphic variant in *TP53* codon 72, has been shown to be associated with susceptibility to a variety of tumors. *miR34b/c* cooperates with *TP53* to control tumorigenesis. In the *TP53*-deficient cells, *miR34b/c* can overexpress to compensate the functions of p53, such as the regulation of senescence and apoptosis [25]. However, the combined effects of *miR34b/c* rs4938723 T>C and *TP53* rs1042522 C>G on Wilms tumor susceptibility remained unclarified. Thus, we conducted the present study to explore the association of *miR34b/c* rs4938723 T>C and *TP53* rs1042522 C>G polymorphisms with Wilms tumor risk.

## Materials and methods

### Study subjects

In the present study, we recruited 183 Wilms tumor patients and 603 cancer-free volunteers from Yuying Children's Hospital of Wenzhou Medical University and Guangzhou Women and Children's Medical Center [26,27]. The age, gender, and clinical stage of all participants are detailed in Supplementary Table S1. At the time of recruitment, all participants or their patients signed informed consent forms. In addition, this investigation was performed with the permission of the Institutional Review Boards of the Yuying Children's Hospital of Wenzhou Medical University and Guangzhou Women and Children's Medical Center.

### SNP selection and genotyping

In this research, we selected two most frequently investigated SNPs in *miR34b/c* and *TP53* (*miR34b/c* rs4938723 and *TP53* rs1042522 polymorphisms) to investigate their associations with Wilms tumor susceptibility. TaqMan method was used for genotyping [28–30]. In addition, negative controls were included in genotyping. In order to ensure the accuracy of genotyping, we blindly took 10% samples for repeated testing, and the results were 100% consistent.

### Statistical analysis

The Hardy–Weinberg equilibrium (HWE) of control subjects was estimated by a goodness-of fit  $\chi^2$  test. The logistic regression analysis was performed. Adjusted odds ratios (ORs) as well as 95% confidence intervals (CIs) were used to assess the correlation of *miR34b/c* rs4938723 and *TP53* rs1042522 polymorphisms with Wilms tumor risk. We considered the difference to be statistically significant only when  $P < 0.05$ .

## Results

### Correlation of *miR34b/c* rs4938723 and *TP53* rs1042522 polymorphisms with Wilms tumor susceptibility

The detailed results are summarized in the Table 1. Both the polymorphisms were in agreement with the HWE ( $P = 0.459$  for the *miR34b/c* rs4938723 T>C polymorphism,  $P = 0.533$  for the *TP53* rs1042522 C>G polymorphism). In our result, for *miR34b/c* rs4938723, the carriers with TC (adjusted OR = 0.73, 95% CI = 0.51–1.06,  $P = 0.097$ ) or CC (adjusted OR = 1.42, 95% CI = 0.83–2.43,  $P = 0.202$ ) genotypes showed no significant association with Wilms tumor risk compared with carriers of the TT genotype. Besides, no significant association was found between rs4938723 and Wilms tumor risk under the additive (adjusted OR = 1.02, 95% CI = 0.79–1.32,  $P = 0.880$ ), dominant (adjusted OR = 0.85, 95% CI = 0.60–1.19,  $P = 0.345$ ) or recessive models (adjusted OR = 1.63, 95% CI = 0.98–2.73,  $P = 0.061$ ). For *TP53* rs1042522, the carriers with CG (adjusted OR = 1.51, 95% CI = 1.00–2.29,  $P = 0.051$ ) or GG (adjusted OR = 1.11, 95% CI = 0.66–1.85,  $P = 0.700$ ) genotypes showed no significant association with Wilms tumor risk compared with carriers of the CC genotype. Besides, no significant association was found between rs1042522 and Wilms tumor

**Table 1 Association between *miR34b/c* rs4938723 T>C and *TP53* rs1042522 C>G polymorphisms with Wilms tumor susceptibility**

| Genotype                             | Cases (n=170) | Controls (n=600) | P <sup>1</sup> | Crude OR (95% CI) | P     | Adjusted OR (95% CI) <sup>2</sup> | P <sup>2</sup> |
|--------------------------------------|---------------|------------------|----------------|-------------------|-------|-----------------------------------|----------------|
| miR34b/c rs4938723 T>C (HWE = 0.459) |               |                  |                |                   |       |                                   |                |
| TT                                   | 86 (50.59)    | 279 (46.50)      |                | 1.00              |       | 1.00                              |                |
| TC                                   | 60 (35.29)    | 266 (44.33)      |                | 0.73 (0.51–1.06)  | 0.098 | 0.73 (0.51–1.06)                  | 0.097          |
| CC                                   | 24 (14.12)    | 55 (9.17)        |                | 1.42 (0.83–2.42)  | 0.205 | 1.42 (0.83–2.43)                  | 0.202          |
| Additive                             |               |                  | 0.881          | 1.02 (0.79–1.32)  | 0.881 | 1.02 (0.79–1.32)                  | 0.880          |
| Dominant                             | 84 (44.91)    | 321 (53.50)      | 0.346          | 0.85 (0.60–1.19)  | 0.346 | 0.85 (0.60–1.19)                  | 0.345          |
| Recessive                            | 146 (85.88)   | 545 (90.83)      | 0.060          | 1.63 (0.98–2.72)  | 0.062 | 1.63 (0.98–2.73)                  | 0.061          |
| TP53 rs1042522 C>G (HWE = 0.533)     |               |                  |                |                   |       |                                   |                |
| CC                                   | 39 (22.94)    | 175 (29.17)      |                | 1.00              |       | 1.00                              |                |
| CG                                   | 98 (57.65)    | 291 (48.50)      |                | 1.51 (1.00–2.29)  | 0.052 | 1.51 (1.00–2.29)                  | 0.051          |
| GG                                   | 33 (19.41)    | 134 (22.33)      |                | 1.11 (0.66–1.85)  | 0.704 | 1.11 (0.66–1.85)                  | 0.700          |
| Additive                             |               |                  | 0.102          | 1.07 (0.84–1.36)  | 0.587 | 1.07 (0.84–1.37)                  | 0.584          |
| Dominant                             | 131 (77.06)   | 425 (70.83)      | 0.110          | 1.38 (0.93–2.06)  | 0.111 | 1.39 (0.93–2.06)                  | 0.109          |
| Recessive                            | 137 (80.59)   | 466 (77.67)      | 0.415          | 0.84 (0.55–1.28)  | 0.415 | 0.84 (0.55–1.28)                  | 0.416          |

<sup>1</sup> $\chi^2$  test for genotype distributions between Wilms tumor patients and controls.

<sup>2</sup>Adjusted for age and gender.

**Table 2 Stratification analysis of risk genotypes with tumor susceptibility**

| Variables       | rs4938723<br>(cases/controls) |       | OR (95% CI)         | P     | AOR (95% CI) <sup>1</sup> | P <sup>1</sup> | rs1042522<br>(cases/controls) |        | OR (95% CI)         | P     | AOR (95% CI) <sup>1</sup> | P <sup>1</sup> |
|-----------------|-------------------------------|-------|---------------------|-------|---------------------------|----------------|-------------------------------|--------|---------------------|-------|---------------------------|----------------|
|                 | TT/TC                         | CC    |                     |       |                           |                | CC                            | CG/GG  |                     |       |                           |                |
|                 |                               |       |                     |       |                           |                |                               |        |                     |       |                           |                |
| Age, months     |                               |       |                     |       |                           |                |                               |        |                     |       |                           |                |
| ≤18             | 64/247                        | 9/21  | 1.65<br>(0.72–3.79) | 0.234 | 1.64<br>(0.71–3.75)       | 0.244          | 11/80                         | 59/188 | 1.79<br>(0.95–3.40) | 0.073 | 1.77<br>(0.94–3.36)       | 0.079          |
| >18             | 82/298                        | 15/34 | 1.60<br>(0.83–3.09) | 0.157 | 1.63<br>(0.85–3.15)       | 0.143          | 25/95                         | 72/237 | 1.15<br>(0.69–1.93) | 0.584 | 1.16<br>(0.69–1.93)       | 0.579          |
| Gender          |                               |       |                     |       |                           |                |                               |        |                     |       |                           |                |
| Female          | 67/244                        | 9/21  | 1.56<br>(0.68–3.57) | 0.291 | 1.56<br>(0.68–3.57)       | 0.291          | 21/79                         | 55/186 | 1.11<br>(0.63–1.96) | 0.713 | 1.11<br>(0.63–1.96)       | 0.712          |
| Male            | 79/301                        | 15/34 | 1.68<br>(0.87–3.24) | 0.121 | 1.68<br>(0.87–3.24)       | 0.121          | 18/96                         | 76/239 | 1.70<br>(0.96–2.99) | 0.067 | 1.70<br>(0.96–2.99)       | 0.067          |
| Clinical stages |                               |       |                     |       |                           |                |                               |        |                     |       |                           |                |
| I+II            | 58/545                        | 7/55  | 1.20<br>(0.52–2.75) | 0.673 | 1.25<br>(0.54–2.88)       | 0.606          | 15/175                        | 50/425 | 1.37<br>(0.75–2.51) | 0.304 | 1.38<br>(0.75–2.52)       | 0.300          |
| III+IV          | 75/545                        | 13/55 | 1.72<br>(0.90–3.29) | 0.103 | 1.73<br>(0.90–3.31)       | 0.102          | 22/175                        | 66/425 | 1.24<br>(0.74–2.07) | 0.420 | 1.23<br>(0.74–2.06)       | 0.431          |

<sup>1</sup>Adjusted for age and gender, without the corresponding stratifying factor.

AOR: adjusted odds ratio

risk under the additive (adjusted OR = 1.07, 95% CI = 0.84–1.37,  $P=0.584$ ), dominant (adjusted OR = 1.39, 95% CI = 0.93–2.06,  $P=0.109$ ) or recessive models (adjusted OR = 0.84, 95% CI = 0.55–1.28,  $P=0.416$ ). In summary, neither of the two selected polymorphisms showed significant association with Wilms tumor risk.

## Stratification analysis

We then analyzed the correlation of *miR34b/c* rs4938723 and *TP53* rs1042522 polymorphisms with Wilms tumor susceptibility in subgroups stratified by age, gender and clinical stage (Table 2). However, no significant association was observed.

## Combined effect analysis

As shown in the Table 3, no statistically significant association was detected in the combined effect analysis. However, the individuals with both *miR34b/c* rs4938723 TC genotype and *TP53* rs1042522 CC genotype might have a borderline significantly decreased risk of Wilms tumor (adjusted OR = 0.51, 95% CI = 0.25–1.01,  $P=0.053$ ).

**Table 3** The association of combined genotypes of *miR34b/c* rs4938723 T>C and *TP53* rs1042522 C>G polymorphisms with Wilms tumor risk

| Genotypes |           | Cases (n=170) | Controls (n=600) | OR (95% CI)      | P     | AOR (95% CI) <sup>1</sup> | P <sup>1</sup> |
|-----------|-----------|---------------|------------------|------------------|-------|---------------------------|----------------|
| rs4938723 | rs1042522 |               |                  |                  |       |                           |                |
| TT        | CC        | 22 (12.94)    | 89 (14.83)       | 1.00             |       | 1.00                      |                |
| TT        | CG        | 46 (27.06)    | 128 (21.33)      | 0.95 (0.57–1.58) | 0.828 | 0.95 (0.57–1.59)          | 0.837          |
| TT        | GG        | 18 (10.59)    | 62 (10.33)       | 0.76 (0.40–1.47) | 0.417 | 0.77 (0.40–1.47)          | 0.425          |
| TC        | CC        | 14 (8.24)     | 73 (12.17)       | 0.50 (0.25–1.01) | 0.052 | 0.51 (0.25–1.01)          | 0.053          |
| TC        | CG        | 35 (20.59)    | 137 (22.83)      | 0.67 (0.39–1.15) | 0.147 | 0.67 (0.39–1.15)          | 0.148          |
| TC        | GG        | 11 (6.47)     | 56 (9.33)        | 0.52 (0.24–1.10) | 0.086 | 0.52 (0.24–1.10)          | 0.087          |
| CC        | CC        | 3 (1.76)      | 13 (2.17)        | 0.61 (0.16–2.26) | 0.456 | 0.61 (0.16–2.27)          | 0.461          |
| CC        | CG        | 17 (10.00)    | 26 (4.33)        | 1.72 (0.83–3.55) | 0.143 | 1.73 (0.84–3.57)          | 0.140          |
| CC        | GG        | 4 (2.35)      | 16 (2.67)        | 0.66 (0.21–2.10) | 0.479 | 0.66 (0.21–2.10)          | 0.476          |

<sup>1</sup>Obtained in logistic regression models with adjustment for age and gender.

## Discussion

We conducted this case–control study to explore the correlation of *miR34b/c* rs4938723 and *TP53* rs1042522 polymorphisms with Wilms tumor risk. No significant association was found in the single locus and stratified analyses. However, the combine effect analysis suggests that the combination of these two gene polymorphisms may have a potential influence on Wilms tumor susceptibility.

To our knowledge, the association between *miR34b/c* and Wilms tumor susceptibility has not been investigated. *miR34b/c* has been shown to be intimately connected to the development and prognosis of a variety of tumors, including gastric cancer, bladder cancer, pancreatic cancer, ovarian cancer, prostate cancer, hepatocellular carcinoma, neuroblastoma and many others [31–35]. In our previous study, we found that *miR34b/c* rs4938723 T>C polymorphism has a protective effect on neuroblastoma [36]. Sato et al. [37] reported that *miR34b/c* methylation in circulating DNA could be used to predict disease progression in malignant pleural mesothelioma patients. Moreover, in a meta-analysis, *miR34b/c* gene polymorphism was shown to increase the risk of gastric cancer and liver cancer while decreasing the risk of esophageal squamous cell carcinoma and colorectal cancer [38].

*TP53* rs1042522 is one of the most investigated *TP53* gene polymorphisms. However, we found no significant association between the *TP53* rs1042522 polymorphism and Wilms tumor risk. A study by Liu et al. [39] revealed that the effect of *TP53* rs1042522 polymorphism on Wilms tumor risk is very weak, which is consistent with our result. Another study conducted by Fu et al. [40] also showed no significant association between *TP53* rs1042522 polymorphism and Wilms tumor risk, and they found that CG/GG genotypes carriers significantly increased Wilms tumor risk in children younger than 18 months of age, compared with CC genotype carriers. Moreover, it is reported that *TP53* rs1042522 may not confer susceptibility to cancers, such as neuroblastoma [41], retinoblastoma [42]. *miR34b/c* is involved in the *TP53* pathway, and their ‘double hit’ (methylation of *miR34* and *TP53* mutations) has been shown to affect survival in a variety of tumors [43]. The negative result in the current study might result from the small sample size.

Several limitations should be addressed. First, in the process of tumorigenesis, the interaction among various gene polymorphisms is very complex. Only selecting two gene polymorphisms might lead to false-negative results. Second, we did not recruit enough participants for the present study. The sample size might not be adequate to detect real association if it is weak. Third, all the recruiters were from Guangzhou and Wenzhou. As a result, selection bias might exist. Our results should be explained with caution.

In summary, our statistical results showed that the association of *miR34b/c* rs4938723 and *TP53* rs1042522 polymorphisms with Wilms tumor susceptibility was not statistically significant. Our findings require validation in the studies with larger sample size.

## Competing Interests

The authors declare that there are no competing interests associated with the manuscript.

## Funding

This work was supported by the Scientific Research Foundation of Wenzhou [grant number 2015Y0492]; the Zhejiang Provincial Science and Technology Animal Experimental Platform Project [grant number 016C37113]; and the Guangdong Provincial Key Laboratory of Research in Structural Birth Defect Disease [grant number 2019B030301004].

## Author Contribution

All authors contributed significantly to this work. J.W., S.L., Y.M., Z.W., X.H., X.T., J.S. and H.Z. performed the research study and collected the samples and data. J.H. analyzed the data. J.H. and J.R. designed the research study. J.W., J.Z., X.H., J.H., and J.R. wrote the paper. J.H. prepared all the tables. All authors reviewed the manuscript. In addition, all authors have read and approved the manuscript.

## Abbreviations

CI, confidence interval; HWE, Hardy–Weinberg equilibrium; OR, odds ratio; SNP, single nucleotide polymorphism.

## References

- Gratias, E.J., Dome, J.S., Jennings, L.J., Chi, Y.Y., Tian, J., Anderson, J. et al. (2016) Association of chromosome 1q gain with inferior survival in favorable-histology Wilms tumor: a report from the Children's Oncology Group. *J. Clin. Oncol.* **34**, 3189–3194, <https://doi.org/10.1200/JCO.2015.66.1140>
- Canning, D.A. (2018) Re: Risk of adverse health and social outcomes up to 50 years after Wilms tumor: The British Childhood Cancer Survivor Study. *J. Urol.* **199**, 1100
- Mahamdallie, S.S., Hanks, S., Karlin, K.L., Zachariou, A., Perdeaux, E.R., Ruark, E. et al. (2015) Mutations in the transcriptional repressor REST predispose to Wilms tumor. *Nat. Genet.* **47**, 1471–1474, <https://doi.org/10.1038/ng.3440>
- Hanks, S., Perdeaux, E.R., Seal, S., Ruark, E., Mahamdallie, S.S., Murray, A. et al. (2014) Germline mutations in the PAF1 complex gene CTR9 predispose to Wilms tumour. *Nat. Commun.* **5**, 4398, <https://doi.org/10.1038/ncomms5398>
- Varanasi, R., Bardeesy, N., Ghahremani, M., Petruzzi, M.J., Nowak, N., Adam, M.A. et al. (1994) Fine structure analysis of the WT1 gene in sporadic Wilms tumors. *Proc. Natl. Acad. Sci. U.S.A.* **91**, 3554–3558, <https://doi.org/10.1073/pnas.91.9.3554>
- Ciceri, S., Gamba, B., Corbetta, P., Mondini, P., Terenziani, M., Catania, S. et al. (2018) Genetic and epigenetic analyses guided by high resolution whole-genome SNP array reveals a possible role of CHEK2 in Wilms tumour susceptibility. *Oncotarget* **9**, 34079–34089, <https://doi.org/10.18632/oncotarget.26123>
- Lemoine, N.R., Hughes, C.M. and Cowell, J.K. (1992) Aberrant expression of the tumour suppressor gene p53 is very frequent in Wilms' tumours. *J. Pathol.* **168**, 237–242, <https://doi.org/10.1002/path.1711680213>
- Malkin, D., Sexsmith, E., Yeger, H., Williams, B.R. and Coppes, M.J. (1994) Mutations of the p53 tumor suppressor gene occur infrequently in Wilms' tumor. *Cancer Res.* **54**, 2077–2079
- Slade, I., Stephens, P., Douglas, J., Barker, K., Stebbings, L., Abbaszadeh, F. et al. (2010) Constitutional translocation breakpoint mapping by genome-wide paired-end sequencing identifies HACE1 as a putative Wilms tumour susceptibility gene. *J. Med. Genet.* **47**, 342–347, <https://doi.org/10.1136/jmg.2009.072983>
- Williams, R.D., Al-Saadi, R., Natrajan, R., Mackay, A., Chagtai, T., Little, S. et al. (2011) Molecular profiling reveals frequent gain of MYCN and anaplasia-specific loss of 4q and 14q in Wilms tumor. *Genes Chromosomes Cancer* **50**, 982–995, <https://doi.org/10.1002/gcc.20907>
- Cardoso, L.C., De Souza, K.R., De, O.R.A.H., Andrade, R.C., Britto, Jr, A.C., De Lima, M.A. et al. (2013) WT1, WTX and CTNNB1 mutation analysis in 43 patients with sporadic Wilms' tumor. *Oncol Rep.* **29**, 315–320, <https://doi.org/10.3892/or.2012.2096>
- Ruteshouser, E.C., Robinson, S.M. and Huff, V. (2008) Wilms tumor genetics: mutations in WT1, WTX, and CTNNB1 account for only about one-third of tumors. *Genes Chromosomes Cancer* **47**, 461–470, <https://doi.org/10.1002/gcc.20553>
- Fu, W., Zhu, J., Xiong, S.W., Jia, W., Zhao, Z., Zhu, S.B. et al. (2017) BARD1 gene polymorphisms confer nephroblastoma susceptibility. *EBioMedicine* **16**, 101–105, <https://doi.org/10.1016/j.ebiom.2017.01.038>
- Zhu, J., Jia, W., Wu, C., Fu, W., Xia, H., Liu, G. et al. (2018) Base excision repair gene polymorphisms and Wilms tumor susceptibility. *EBioMedicine* **33**, 88–93, <https://doi.org/10.1016/j.ebiom.2018.06.018>
- Fu, W., Zhuo, Z., Hua, R.X., Fu, K., Jia, W., Zhu, J. et al. (2019) Association of KRAS and NRAS gene polymorphisms with Wilms tumor risk: a four-center case-control study. *Aging (Albany N.Y.)* **11**, 1551–1563, <https://doi.org/10.18632/aging.101855>
- Jiang, S. (2019) Special issue editorial: recent progress of MicroRNA research in immunity. *Cancer Lett.* **456**, 88–89, <https://doi.org/10.1016/j.canlet.2019.04.038>
- Forno, I., Ferrero, S., Russo, M.V., Gazzano, G., Giangiobbe, S., Montanari, E. et al. (2015) Deregulation of MiR-34b/Sox2 predicts prostate cancer progression. *PLoS ONE* **10**, e0130060, <https://doi.org/10.1371/journal.pone.0130060>
- Lan, V.T.T., Son, H.V., Trang, V.L., Trang, N.T., Phuong, N.T., Toan, N.L. et al. (2018) Methylation profiles of miR34 gene family in Vietnamese patients suffering from breast and lung cancers. *Mol. Med. Rep.* **18**, 2476–2484
- Kim, J.S., Kim, E.J., Lee, S., Tan, X., Liu, X., Park, S. et al. (2019) MiR-34a and miR-34b/c have distinct effects on the suppression of lung adenocarcinomas. *Exp. Mol. Med.* **51**, 9, <https://doi.org/10.1038/s12276-018-0203-1>
- Xu, Y., Liu, L., Liu, J., Zhang, Y., Zhu, J., Chen, J. et al. (2011) A potentially functional polymorphism in the promoter region of miR-34b/c is associated with an increased risk for primary hepatocellular carcinoma. *Int. J. Cancer* **128**, 412–417, <https://doi.org/10.1002/ijc.25342>



- 21 Zhang, J. and Wang, L. (2019) Association between rs4938723 polymorphism and the risk of primary open-angle glaucoma (POAG) in a Chinese population. *J. Cell. Biochem.* **120**, 12875–12886, <https://doi.org/10.1002/jcb.28559>
- 22 Koifman, G., Aloni-Grinstein, R. and Rotter, V. (2019) p53 balances between tissue hierarchy and anarchy. *J. Mol. Cell Biol.* **11**, 553–563, <https://doi.org/10.1093/jmcb/mjz022>
- 23 Oh, H.J., Bae, J.M., Wen, X., Jung, S., Kim, Y., Kim, K.J. et al. (2019) p53 expression status is associated with cancer-specific survival in stage III and high-risk stage II colorectal cancer patients treated with oxaliplatin-based adjuvant chemotherapy. *Br. J. Cancer* **120**, 797–805, <https://doi.org/10.1038/s41416-019-0429-2>
- 24 Franken, J., Lerut, E., Van Poppel, H. and Bogaert, G. (2013) p53 Immunohistochemistry expression in Wilms tumor: a prognostic tool in the detection of tumor aggressiveness. *J. Urol.* **189**, 664–670, <https://doi.org/10.1016/j.juro.2012.09.115>
- 25 Asmar, F., Hother, C., Kulosman, G., Treppendahl, M.B., Nielsen, H.M., Ralfkiaer, U. et al. (2014) Diffuse large B-cell lymphoma with combined TP53 mutation and MIR34A methylation: another “double hit” lymphoma with very poor outcome? *Oncotarget* **5**, 1912–1925, <https://doi.org/10.18632/oncotarget.1877>
- 26 Huang, X., Zhao, J., Zhu, J., Chen, S., Fu, W., Tian, X. et al. (2019) MYCN gene polymorphisms and Wilms tumor susceptibility in Chinese children. *J. Clin. Lab. Anal.* **33**, e22988, <https://doi.org/10.1002/jcla.22988>
- 27 Huang, X., Zhao, J., Fu, W., Zhu, J., Lou, S., Tian, X. et al. (2020) The association of RAN and RANBP2 gene polymorphisms with Wilms tumor risk in Chinese children. *J. Cancer* **11**, 804–809, <https://doi.org/10.7150/jca.36651>
- 28 He, J., Wang, F., Zhu, J., Zhang, R., Yang, T., Zou, Y. et al. (2016) Association of potentially functional variants in the XPG gene with neuroblastoma risk in a Chinese population. *J. Cell. Mol. Med.* **20**, 1481–1490, <https://doi.org/10.1111/jcmm.12836>
- 29 Chen, X., Wang, Y., Cheng, K., Li, J., Lou, J., Ke, J. et al. (2016) Genetic variants in the regulatory region of SLC10A1 are not associated with the risk of hepatitis B virus infection and clearance. *Infect. Genet. Evol.* **44**, 495–500, <https://doi.org/10.1016/j.meegid.2016.07.043>
- 30 Chang, J., Zhong, R., Tian, J., Li, J., Zhai, K., Ke, J. et al. (2018) Exome-wide analyses identify low-frequency variant in CYP26B1 and additional coding variants associated with esophageal squamous cell carcinoma. *Nat. Genet.* **50**, 338–343, <https://doi.org/10.1038/s41588-018-0045-8>
- 31 Wang, X., Lu, X., Fang, Y., Chen, H., Deng, X., Peng, C. et al. (2014) Association between miR34b/c polymorphism rs4938723 and cancer risk: a meta-analysis of 11 studies including 6169 cases and 6337 controls. *Med. Sci. Monit.* **20**, 1977–1982
- 32 Hashemi, M., Hasanpour, V., Danesh, H., Bizhani, F. and Narouie, B. (2018) Association between Pri-miR-34b/c rs4938723 polymorphism and bladder cancer risk. *J. Biomed. Res.*, <https://doi.org/10.7555/JBR.31.20170044>
- 33 Wang, J., Liu, Q., Yuan, S., Xie, W., Liu, Y., Xiang, Y. et al. (2017) Genetic predisposition to lung cancer: comprehensive literature integration, meta-analysis, and multiple evidence assessment of candidate-gene association studies. *Sci. Rep.* **7**, 8371, <https://doi.org/10.1038/s41598-017-07737-0>
- 34 Liu, C.J., Ma, X.W., Zhang, X.J. and Shen, S.Q. (2017) pri-miR-34b/c rs4938723 polymorphism is associated with hepatocellular carcinoma risk: a case-control study in a Chinese population. *Int. J. Mol. Epidemiol. Genet.* **8**, 1–7
- 35 Li, L., Zhu, J., Lu, T., Liu, W., Tang, J., Zhang, J. et al. (2019) Association of miR-34b/c rs4938723 and TP53 Arg72Pro polymorphisms with neuroblastoma susceptibility: evidence from seven centers. *Transl. Oncol.* **12**, 1282–1288, <https://doi.org/10.1016/j.tranon.2019.06.008>
- 36 He, J., Zou, Y., Liu, X., Zhu, J., Zhang, J., Zhang, R. et al. (2018) Association of common genetic variants in pre-microRNAs and neuroblastoma susceptibility: a two-center study in Chinese children. *Mol. Ther. Nucleic Acids* **11**, 1–8, <https://doi.org/10.1016/j.omtn.2018.01.003>
- 37 Sato, H., Soh, J., Aoe, K., Fujimoto, N., Tanaka, S., Namba, K. et al. (2019) Droplet digital PCR as a novel system for the detection of microRNA34b/c methylation in circulating DNA in malignant pleural mesothelioma. *Int. J. Oncol.* **54**, 2139–2148
- 38 Hashemi, M., Moazeni-Roodi, A., Bahari, G., Taheri, M. and Ghavami, S. (2019) Association between miR-34b/c rs4938723 polymorphism and risk of cancer: an updated meta-analysis of 27 case-control studies. *J. Cell. Biochem.* **120**, 3306–3314, <https://doi.org/10.1002/jcb.27598>
- 39 Liu, P., Zhuo, Z., Li, W., Cheng, J., Zhou, H., He, J. et al. (2019) TP53 rs1042522 C>G polymorphism and Wilms tumor susceptibility in Chinese children: a four-center case-control study. *Biosci. Rep.* **39**, BSR20181891
- 40 Fu, W., Zhuo, Z.J., Jia, W., Zhu, J., Zhu, S.B., Lin, Z.F. et al. (2017) Association between TP53 gene Arg72Pro polymorphism and Wilms' tumor risk in a Chinese population. *Oncotargets Ther.* **10**, 1149–1154, <https://doi.org/10.2147/OTT.S131014>
- 41 He, J., Wang, F., Zhu, J., Zhang, Z., Zou, Y., Zhang, R. et al. (2017) The TP53 gene rs1042522 C>G polymorphism and neuroblastoma risk in Chinese children. *Aging (Albany N.Y.)* **9**, 852–859
- 42 Chen, R., Liu, S., Ye, H., Li, J., Du, Y., Chen, L. et al. (2015) Association of p53 rs1042522, MDM2 rs2279744, and p21 rs1801270 polymorphisms with retinoblastoma risk and invasion in a Chinese population. *Sci. Rep.* **5**, 13300, <https://doi.org/10.1038/srep13300>
- 43 Wong, K.Y., Yim, R.L., So, C.C., Jin, D.Y., Liang, R. and Chim, C.S. (2011) Epigenetic inactivation of the MIR34B/C in multiple myeloma. *Blood* **118**, 5901–5904, <https://doi.org/10.1182/blood-2011-06-361022>
